# Supplementary material
Source: PubMed Central journal article supplement (PMC6851486)
Supplement: NIHMS1537912-supplement-1.pdf [file NIHMS1537912-supplement-1.pdf]

## Supplementary Information

### Assessment of Protein Model Structure Accuracy Estimation in CASP13: Challenges in the Era of Deep Learning

Jonghun Won<sup>1†</sup>, Minkyung Baek<sup>1†‡</sup>, Bohdan Monastyrskyy<sup>2</sup>, Andriy Kryshchak<sup>2</sup>, and  
Chaok Seok<sup>1\*</sup>

*Correspondence to: Chaok Seok, Phone: +82-2-880-9197, E-mail: chaok@snu.ac.kr*

<sup>1</sup> *Department of Chemistry, Seoul National University, Seoul 08826, Republic of Korea*

<sup>2</sup> *Genome Center, University of California, Davis, California 95616, USA*

<sup>†</sup> *JW and MB should be considered joint first author.*

<sup>‡</sup> *Present address: Department of Biochemistry, University of Washington, Seattle,  
Washington 98195, USA*

## SUPPLEMENTARY TEXT

Examples of the cases in which models of similar GDT-TS but different LDDT and similar LDDT but different GDT-TS emphasize different aspects of model accuracy are described below. Model structures are compared in the next page for the targets whose experimental structures are public.

| Target<br>(Oligomeric state)          | Model A |        |      | Model B |        |      |
|---------------------------------------|---------|--------|------|---------|--------|------|
|                                       | Model   | GDT-TS | LDDT | Model   | GDT-TS | LDDT |
| <b>Similar GDT-TS, different LDDT</b> |         |        |      |         |        |      |
| T1002 (A1)                            | TS156_2 | 42     | 61   | TS386_3 | 43     | 46   |
| T1004 (A3)                            | TS324_3 | 53     | 77   | TS116_5 | 53     | 63   |
| T0974s1 (A1B1)                        | TS368_1 | 98     | 91   | TS312_3 | 95     | 78   |
| <b>Similar LDDT, different GDT-TS</b> |         |        |      |         |        |      |
| T0973 (A2)                            | TS156_2 | 84     | 70   | TS386_5 | 56     | 66   |
| T1022s2 (A6B3)                        | TS386_4 | 62     | 59   | TS324_1 | 40     | 55   |
| T0976 (A2)                            | TS145_5 | 59     | 69   | TS368_3 | 38     | 68   |

In the two cases, T1002 (**Figure A**) and T1004, more accurate local structures of the region not superposed to the native structure are not reflected in GDT-TS but in LDDT. In the case of T0974s1, high accuracy of local side chain packing is reflected only in LDDT but not in GDT-TS when the global model accuracy is very high.

The case of T0973 is a pathological example which originates from the property of LDDT that does not penalize contacts that are not present in the reference structure. The relatively low GDT-TS compared to LDDT of TS386\_5 is due to a large non-native contact between secondary structure elements, not penalized in LDDT. In the two cases T1022s2 (**Figure B**) and T0976 (**Figure C**), models of similar local structure accuracy show very different global structure accuracy due to different domain orientations.

**A** T1002 (A1)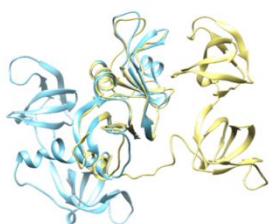

TS156\_2 (42, 61)

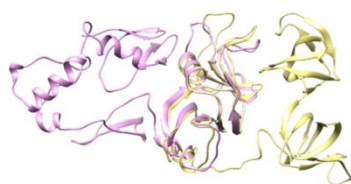

TS368\_3 (43, 46)

**B** T1022s2 (A6B3)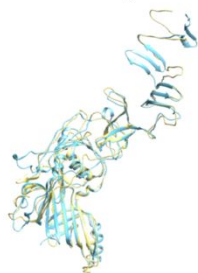

TS368\_4 (62, 59)

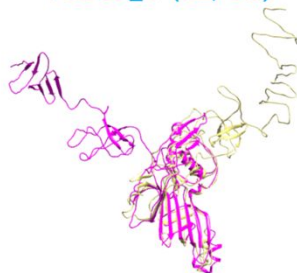

TS324\_1 (40, 55)

**C** T0976 (A2)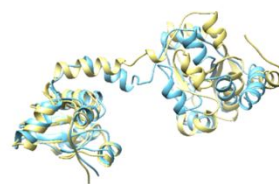

TS145\_5 (59, 69)

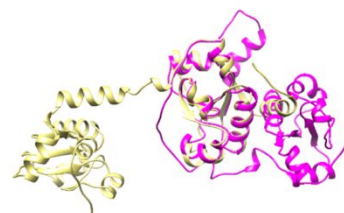

TS368\_3 (38, 68)

 experiment

## SUPPLEMENTARY FIGURES

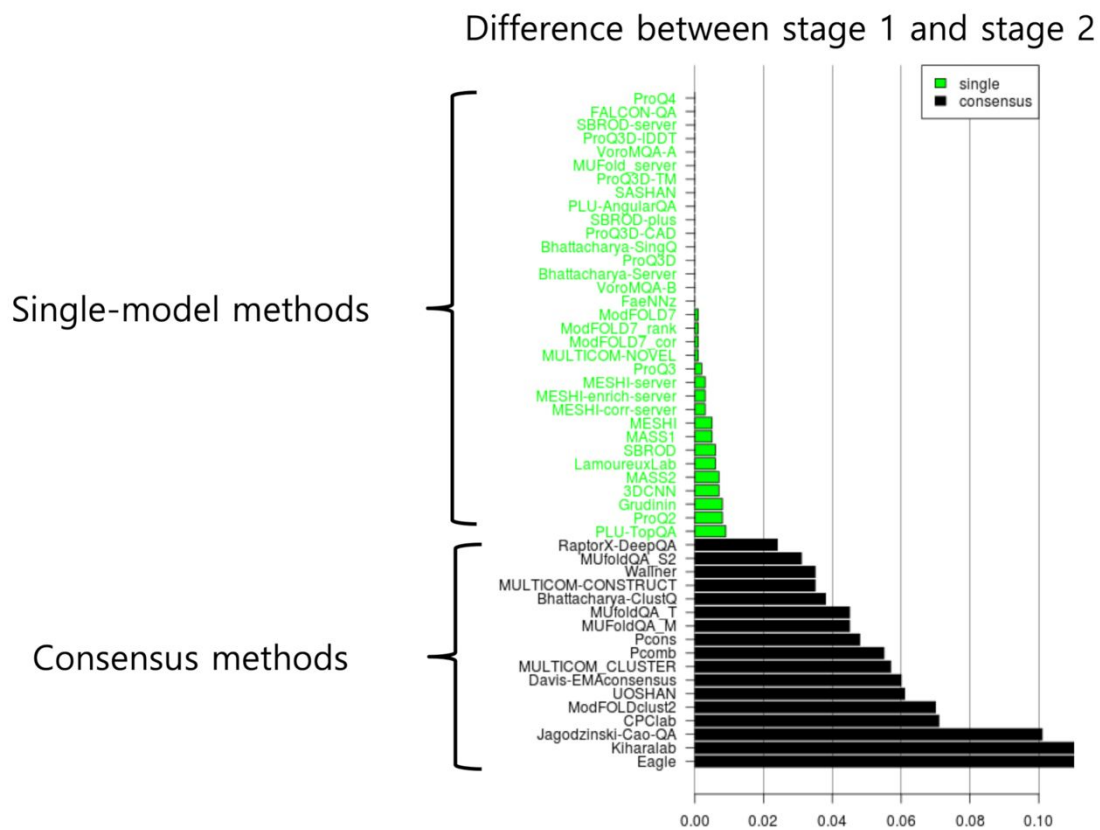

**Figure S1.** Classification of the EMA methods into single-model and consensus methods by the difference of scores submitted in the first stage and the second stage.

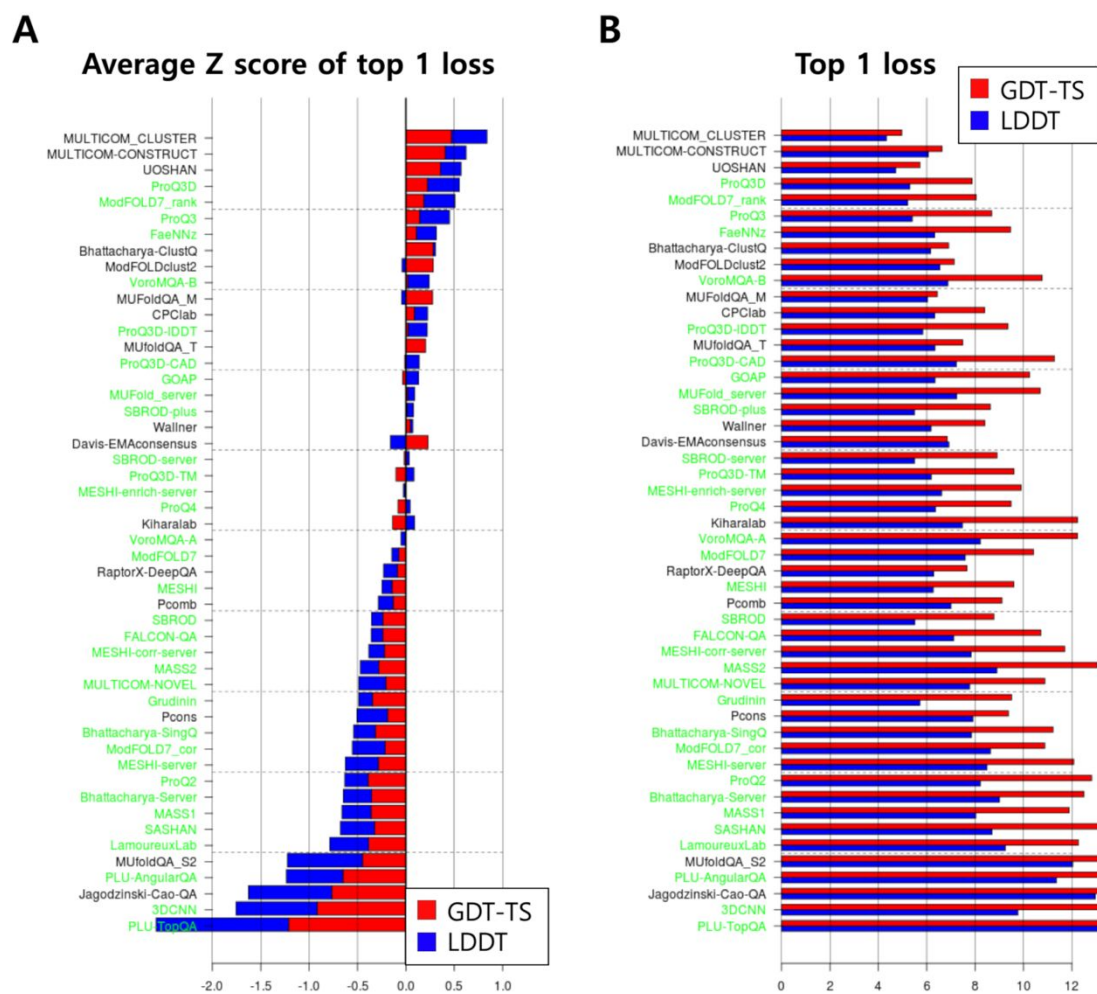

**Figure S2.** Ranking of the EMA methods in global accuracy estimation in terms of top 1 loss when only single-EU targets are considered.

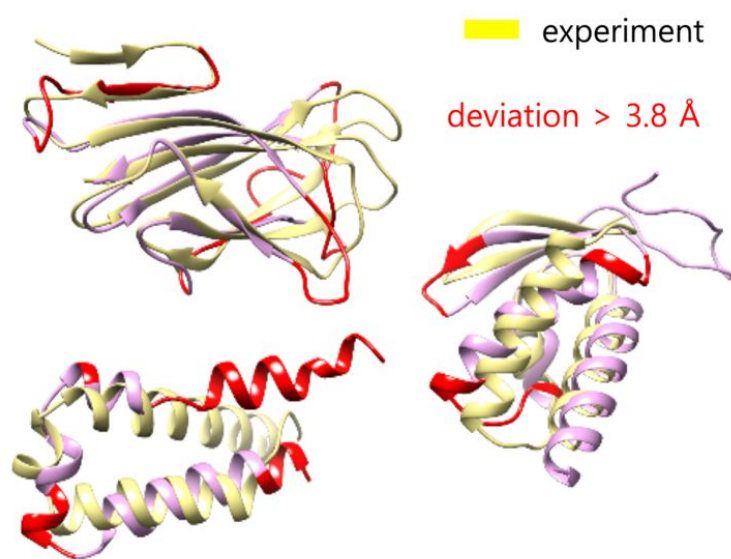

**Figure S3.** Examples of ULRs for which  $C\alpha$  deviations of the residues are greater than 3.8 Å after superposition to the experimental structure. Experimental structures are colored in yellow, model structures in pink and red, where red indicate ULRs.

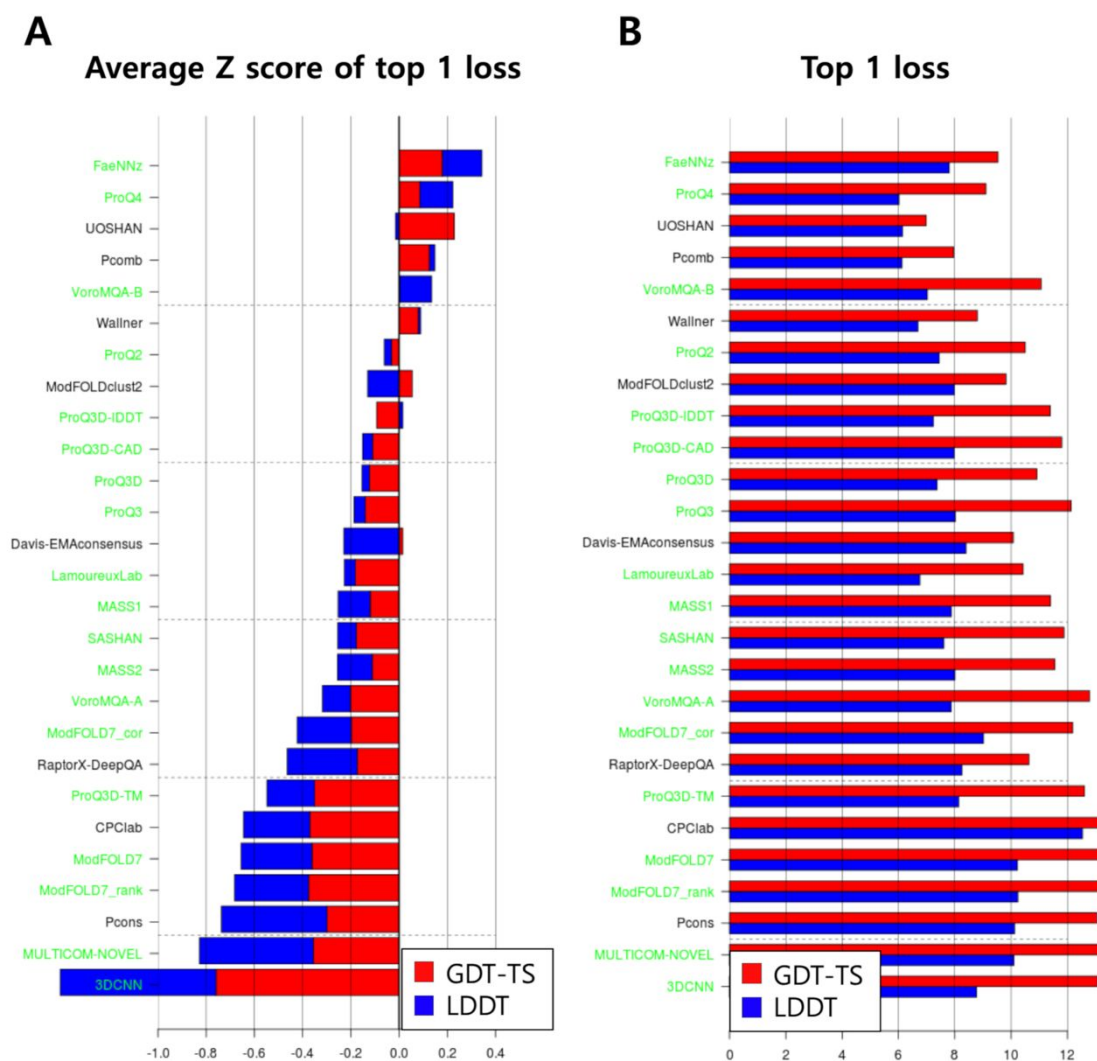

**Figure S4.** Performance of local EMA methods in global accuracy estimation in top 1 loss when local accuracy scores of the residues in each evaluation unit are converted to a global score and used to select top 1 model for the evaluation unit. A global score for each evaluation unit was calculated from the submitted local scores (which are supposed to be distance errors) as in GDT-TS calculation except for the cases in which all submitted local scores were less than one. In those cases, a global score was calculated as an average of the local scores as in LDDT calculation.

### Top1 GDT-TS loss for single-EU targets

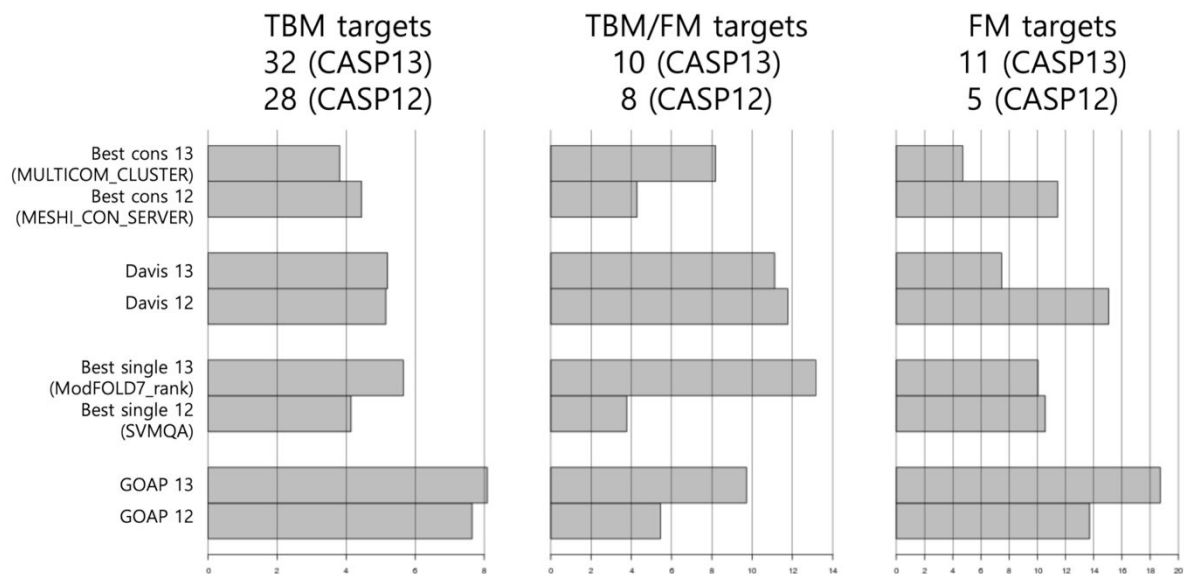

**Figure S5.** Performance comparison of the best EMA methods and reference methods in CASP12 and CASP13 for targets in different TS categories.



## SUPPLEMENTARY TABLE

**Table S1.** Statistical comparison of top 1 GDT-TS/LDDT loss.

|                     | MULTICOM_CLUSTER | ModFOLD7_rank | UOSHAN | MULTICOM-CONSTRUCT | Bhattacharya-ClustQ | ModFOLDclust2 | MUfoldQA_T | MUFoldQA_M | ProQ3D | FaeNNz |
|---------------------|------------------|---------------|--------|--------------------|---------------------|---------------|------------|------------|--------|--------|
| MULTICOM_CLUSTER    |                  | +=            | ==     | ++                 | ++                  | ++            | ++         | ==         | ++     | ++     |
| ModFOLD7_rank       |                  |               | ==     | ==                 | ==                  | ==            | ==         | ==         | ==     | ==     |
| UOSHAN              |                  |               |        | ==                 | ==                  | ++            | ==         | ==         | ++     | ++     |
| MULTICOM-CONSTRUCT  |                  |               |        |                    | ==                  | ==            | ==         | ==         | ==     | ==     |
| Bhattacharya-ClustQ |                  |               |        |                    |                     | ==            | ==         | ==         | ==     | ==     |
| ModFOLDclust2       |                  |               |        |                    |                     |               | ==         | ==         | ==     | ==     |
| MUfoldQA_T          |                  |               |        |                    |                     |               |            | ==         | ==     | ==     |
| MUFoldQA_M          |                  |               |        |                    |                     |               |            |            | ==     | ++     |
| ProQ3D              |                  |               |        |                    |                     |               |            |            |        | ==     |
| FaeNNz              |                  |               |        |                    |                     |               |            |            |        |        |

The above table shows summary of the two-tailed paired t-tests on per-target differences between the models predicted as the best and the actual best models. Top 10 groups according to the cumulative ranking are mutually compared. Single-model methods are in green and consensus methods are in black. Each cell contains two characters representing the comparison between the two groups. “+” represents that the performance of the row group is statistically better than that of the column group. “-” represents the opposite case. “=” represents no significance. P-value threshold of 0.05 is used for all tests. The first character relates to GDT-TS and the second character relates to LDDT.

**Table S2.** Statistical comparison of absolute GDT-TS/LDDT accuracy estimation.

|                    | MULTICOM-CONSTRUCT | MULTICOM_CLUSTER | ModFOLD7_cor | FaeNNz | ModFOLD7 | MUfoldQA_T | MUFoldQA_M | UOSHAN | ModFOLD7_rank | ProQ3D-IDDT |
|--------------------|--------------------|------------------|--------------|--------|----------|------------|------------|--------|---------------|-------------|
| MULTICOM-CONSTRUCT |                    | +=               | -+           | +=     | -+       | -+         | -+         | -+     | ++            | +=          |
| MULTICOM_CLUSTER   |                    |                  | +=           | +-     | +=       | -+         | -+         | -+     | +=            | +=          |
| ModFOLD7_cor       |                    |                  |              | +-     | ==       | -+         | -+         | -+     | +-            | +-          |
| FaeNNz             |                    |                  |              |        | -+       | -+         | -+         | -+     | +=            | ++          |
| ModFOLD7           |                    |                  |              |        |          | -+         | -+         | -+     | +-            | +-          |
| MUfoldQA_T         |                    |                  |              |        |          |            | ==         | ==     | +-            | +-          |
| MUFoldQA_M         |                    |                  |              |        |          |            |            | =      | +-            | +-          |
| UOSHAN             |                    |                  |              |        |          |            |            |        | +-            | +-          |
| ModFOLD7_rank      |                    |                  |              |        |          |            |            |        |               | =           |
| ProQ3D-IDDT        |                    |                  |              |        |          |            |            |        |               |             |

The above table shows summary of the two-tailed paired t-tests on per-target differences between the predicted and observed model accuracy. Top 10 groups according to the cumulative ranking are mutually compared. Single-model methods are in green and consensus methods are in black. Each cell contains two characters representing the comparison between the two groups. “+” represents that the performance of the row group is statistically better than that of the column group. “-” represents the opposite case. “=” represents no significance. P-value threshold of 0.05 is used for all tests. The first character relates to GDT-TS and the second character relates to LDDT.

**Table S3.** Statistical comparison of ULR F1 values.

|                    | VoroMQA-A | UOSHAN | VoroMQA-B | ModFOLDclust2 | ProQ4 | Davis-EMAconsensus | ModFOLD7 | ModFOLD7_rank | ProQ3D-CAD | FaeNNz |
|--------------------|-----------|--------|-----------|---------------|-------|--------------------|----------|---------------|------------|--------|
| VoroMQA-A          | -         | +      | =         | +             | =     | =                  | =        | =             | +          | +      |
| UOSHAN             |           |        | +         | +             | +     | +                  | +        | +             | +          | +      |
| VoroMQA-B          |           |        |           | =             | +     | =                  | =        | =             | +          | +      |
| ModFOLDclust2      |           |        |           |               | +     | +                  | +        | +             | +          | +      |
| ProQ4              |           |        |           |               |       | =                  | =        | =             | =          | =      |
| Davis-EMAconsensus |           |        |           |               |       |                    | =        | =             | +          | +      |
| ModFOLD7           |           |        |           |               |       |                    |          | =             | =          | =      |
| ModFOLD7_rank      |           |        |           |               |       |                    |          |               | =          | =      |
| ProQ3D-CAD         |           |        |           |               |       |                    |          |               |            | =      |
| FaeNNz             |           |        |           |               |       |                    |          |               |            |        |

The above table shows summary of the two-tailed paired Wilcoxon-tests on per-target ULR F1 values. Top 10 groups according to the ULR F1 ranking are mutually compared. Single-model methods are in green and consensus methods are in black. Each cell contains two characters representing the comparison between the two groups. “+” represents that the performance of the row group is statistically better than that of the column group. “-” represents the opposite case. “=” represents no significance. P-value threshold of 0.05 is used for all tests.

**Table S4.** Statistical comparison of AUC of local error estimation.

|                    | Davis-EMAconsensus | Pcomb | ModFOLDclust2 | Wallner | ModFOLD7 | ModFOLD7_rank | UOSHAN | ModFOLD7_cor | ProQ3 | RaptorX-DeepQA |
|--------------------|--------------------|-------|---------------|---------|----------|---------------|--------|--------------|-------|----------------|
| Davis-EMAconsensus |                    | +     | =             | +       | +        | +             | +      | +            | +     | +              |
| Pcomb              |                    |       | =             | +       | =        | =             | =      | +            | +     | +              |
| ModFOLDclust2      |                    |       |               | -       | -        | -             | +      | +            | +     | +              |
| Wallner            |                    |       |               |         | =        | =             | =      | +            | +     | +              |
| ModFOLD7           |                    |       |               |         |          | =             | =      | +            | +     | +              |
| ModFOLD7_rank      |                    |       |               |         |          |               | =      | +            | +     | +              |
| UOSHAN             |                    |       |               |         |          |               |        | =            | =     | +              |
| ModFOLD7_cor       |                    |       |               |         |          |               |        |              | =     | =              |
| ProQ3              |                    |       |               |         |          |               |        |              |       | =              |
| RaptorX-DeepQA     |                    |       |               |         |          |               |        |              |       |                |

The above table shows summary of the two-tailed paired Wilcoxon-tests on per-target AUC differences.

Top 10 groups according to the AUC ranking are mutually compared. Single-model methods are in green and consensus methods are in black. Each cell contains two characters representing the comparison between the two groups. “+” represents that the performance of the row group is statistically better than that of the column group. “-” represents the opposite case. “=” represents no significance. P-value threshold of 0.05 is used for all tests.

**Table S5.** Statistical comparison of ASE.

|               | VoroMQA-A | VoroMQA-B | UOSHAN | ProQ4 | ModFOLD7 | ModFOLD7_rank | ProQ2 | MASS2 | MASS1 | ProQ3 |
|---------------|-----------|-----------|--------|-------|----------|---------------|-------|-------|-------|-------|
| VoroMQA-A     |           | +         | +      | +     | +        | +             | +     | +     | +     | +     |
| VoroMQA-B     |           |           | +      | +     | +        | +             | +     | +     | +     | +     |
| UOSHAN        |           |           |        | =     | =        | =             | =     | =     | =     | =     |
| ProQ4         |           |           |        |       | +        | +             | +     | +     | +     | =     |
| ModFOLD7      |           |           |        |       |          | =             | -     | -     | -     | -     |
| ModFOLD7_rank |           |           |        |       |          |               | -     | -     | -     | -     |
| ProQ2         |           |           |        |       |          |               |       | =     | =     | -     |
| MASS2         |           |           |        |       |          |               |       |       | =     | =     |
| MASS1         |           |           |        |       |          |               |       |       |       | =     |
| ProQ3         |           |           |        |       |          |               |       |       |       |       |

The above table shows summary of the two-tailed paired t-tests on per-target ASE differences. Top 10 groups according to the ASE ranking are mutually compared. Single-model methods are in green and consensus methods are in black. Each cell contains two characters representing the comparison between the two groups. “+” represents that the performance of the row group is statistically better than that of the column group. “-” represents the opposite case. “=” represents no significance. P-value threshold of 0.05 is used for all tests.

**Table S6.** GDT-TS loss and MolProbity score of the top 1 models selected by three EMA methods ‘Davis-EMAconsensus’, ‘GOAP’, and ‘ProQ3’

| FM target | Davis-EMAconsensus |              |      | GOAP  |              |      | ProQ3        |              |                        |
|-----------|--------------------|--------------|------|-------|--------------|------|--------------|--------------|------------------------|
|           | Model              | $\Delta$ GDT | MolP | Model | $\Delta$ GDT | MolP | Model        | $\Delta$ GDT | MolP                   |
| T0953s1   | 149_4              | 6.0          | 4.1  | 085_1 | 16.8         | 1.8  | 261_1        | 4.1          | 2.8                    |
| T0957s2   | 324_3              | 7.7          | 3.3  | 402_5 | 31.0         | 0.7  | 261_1        | 13.1         | 2.2                    |
| T0968s1   | 498_2              | 5.9          | 3.5  | 368_1 | 0.0          | 0.7  | 368_2        | 7.8          | 0.7                    |
| T0968s2   | 498_4              | 7.8          | 3.7  | 407_3 | 32.8         | 1.5  | 368_1        | 11.7         | 1.0                    |
| T0969     | 324_4              | 12.1         | 3.6  | 368_5 | 27.3         | 1.2  | <b>498_5</b> | <b>1.4</b>   | <b>3.8<sup>†</sup></b> |
| T0975     | 261_2              | 19.4         | 3.1  | 368_1 | 19.6         | 1.0  | 368_1        | 19.6         | 1.0                    |
| T0980s1   | 145_1              | 0.0          | 3.3  | 368_1 | 14.4         | 1.4  | 368_1        | 14.4         | 1.4                    |
| T0986s2   | 324_5              | 0.0          | 3.5  | 368_1 | 24.0         | 1.0  | 407_1        | 15.8         | 1.0                    |
| T1001     | 156_5              | 17.6         | 1.0  | 368_2 | 0.0          | 1.1  | 368_4        | 1.6          | 1.2                    |
| T1015s1   | 261_2              | 2.3          | 2.4  | 407_4 | 27.6         | 0.5  | 368_1        | 5.1          | 0.7                    |
| T1017s2   | 261_1              | 3.8          | 2.9  | 368_4 | 12.4         | 0.9  | 407_1        | 29.4         | 1.2                    |

<sup>†</sup> A model of high MolProbity score was selected
